# Supplementary material for: Confined synthesis of ultrafine Ru–B amorphous alloy and its catalytic behavior toward selective hydrogenation of benzene
Source: Royal Society of Chemistry journal article supplement (doi:10.1039/c4ta00023d), 2014-01-01
Supplement: c4ta00023d1.pdf [file c4ta00023d1.pdf]

**Electronic supplementary information for**  
**Confined synthesis of ultrafine Ru-B amorphous alloy and its**  
**catalytic behavior toward selective hydrogenation of benzene**

**Jie Liu, Shan He,\* Changming Li, Fei Wang, Min Wei,\* David G. Evans and Xue Duan**

*State Key Laboratory of Chemical Resource Engineering, Beijing University of Chemical  
Technology, Beijing 100029, P. R. China*

\* Corresponding authors. Tel: +86-10-64412131; Fax: +86-10-64425385.

E-mail addresses: [vh30@163.com](mailto:vh30@163.com) (S. He); [weimin@mail.buct.edu.cn](mailto:weimin@mail.buct.edu.cn) (M. Wei)

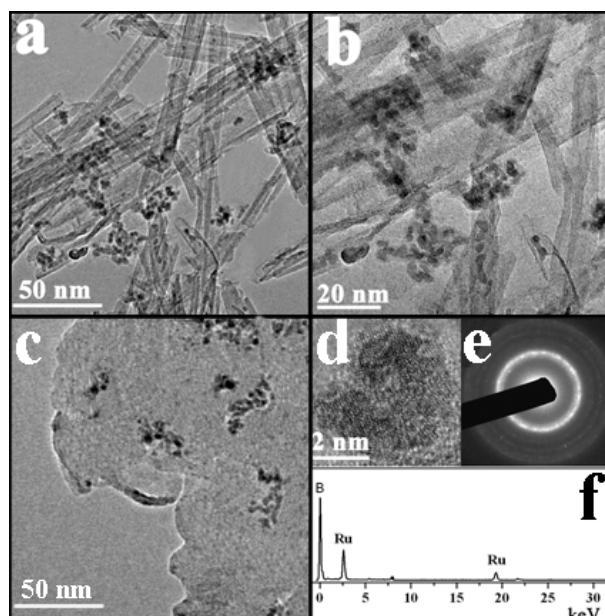

**Figure S1.** (a, b) TEM images of RuB/TNT-IMP at low and high magnification, (c) TEM image of RuB/TNS-IMP, (d, e) HRTEM and SEAD image for a single Ru-B NP, (f) EDS results of Ru-B particles.

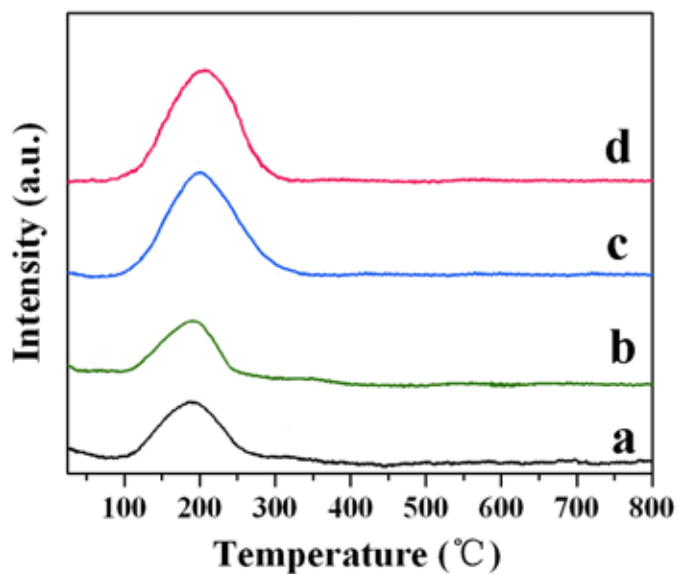

**Figure S2.** H<sub>2</sub>-TPD profiles of (a) Ru-B/TNT-IMP, (b) Ru-B/TNS-IMP, (c) Ru-B/TNT, (d) Ru-B/TNS.

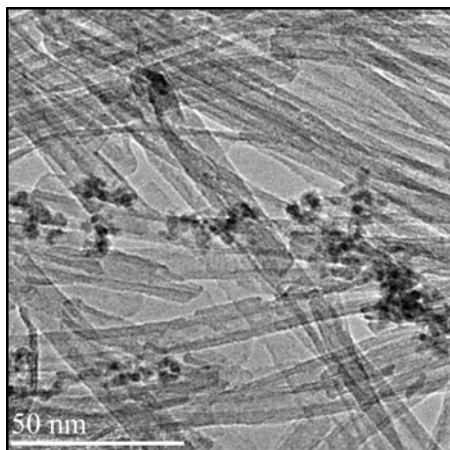

**Figure S3.** TEM image of Ru-B catalyst prepared by the confined synthesis method in which RuCl<sub>3</sub>·3H<sub>2</sub>O water solution was used.

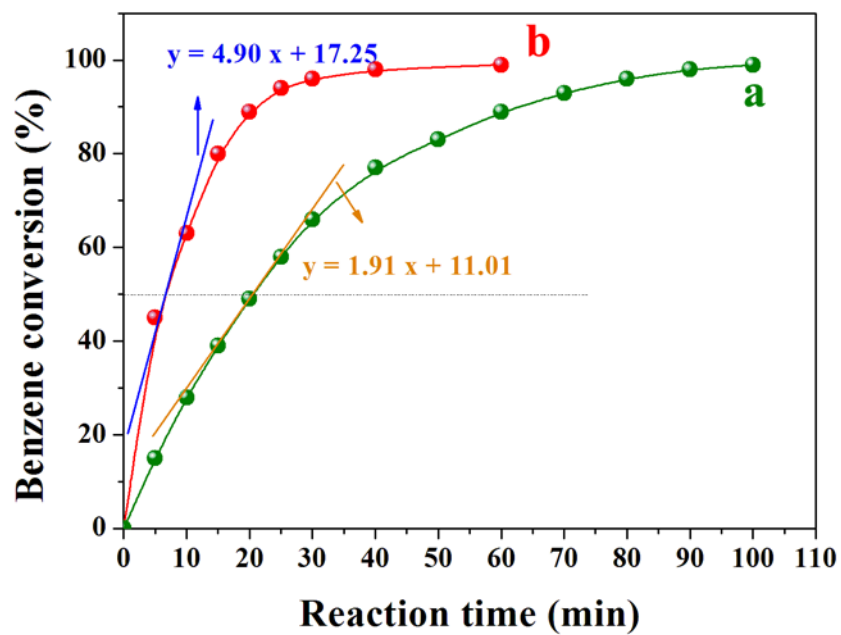

**Figure S4.** Benzene conversion as a function of reaction time over Ru-B/TNT catalyst (a) and Ru-B/TNS catalyst (b). The slope of the conversion-time plot at the half conversion of benzene was used to indicate the reaction rate over different catalysts.
